# Supplementary material for: Quantification of Atmospheric Ammonia Concentrations: A Review of its Measurement and Modeling
Source: Preprints.org preprint supplement (doi:10.20944/preprints202008.0468.v1), 2020-08-21
Supplement: Supplementary file 1 [file supplementary]

**Supplementary Information:**

Quantification of atmospheric ammonia concentrations: A review of its measurement and modeling

Arshad Arjunan Nair\* and Fangqun Yu

*Atmospheric Sciences Research Center, State University of New York at Albany, 251 Fuller Road, Albany, NY 12203, USA*

\*Corresponding author: Arshad Arjunan Nair (aanair@albany.edu) and Fangqun Yu (fyu@albany.edu)

This document contains Table S1 and S2. Table S1 lists some of the in situ measurements of atmospheric ammonia concentrations reviewed in the main manuscript. Table S2 lists the equilibrium models used in the modeling studies listed in Table 3 of the main manuscript.

Table S1: In situ measurements of [NH<sub>3</sub>].

| Reference                   | Location                      | Period                                 | Instrument                                                                      | [NH <sub>3</sub> ]           | ~ppbv |
|-----------------------------|-------------------------------|----------------------------------------|---------------------------------------------------------------------------------|------------------------------|-------|
| <i>Surface Observations</i> |                               |                                        |                                                                                 |                              |       |
| Hoell et al. 1980           | Hampton, VA                   | Mar 1979–Aug 1979                      | Remote Infrared Heterodyne Radiometer                                           | 10–1.3 ppbv                  | 8.1   |
| Cadle et al. 1982           | (U) Commerce City, CO         | 11 Nov–21 Dec 1978                     | Oxalic acid filter pack / Technicon analyser or Modified Indophenol blue method | 3.4 ppbv                     | 3.4   |
|                             | (U) Warren, MI                | 5 Sep–1 Oct 1979                       |                                                                                 | 1.2 ppbv                     | 1.2   |
|                             |                               | 22 Jan–18 Feb 1980                     |                                                                                 | 0.79 ppbv                    | 0.8   |
|                             |                               | 19 May–12 Jun 1980                     |                                                                                 | 1.3 ppbv                     | 1.3   |
|                             | (R) Abbeville, LA             | 6 Jun–25 Aug 1979                      |                                                                                 | 0.80 ppbv                    | 0.8   |
|                             | (R) Luray, VA                 | 13 Jul–10 Aug 1980                     |                                                                                 | 1.9 ppbv                     | 1.9   |
| Alkezweeny et al. 1986      | Lexington, KY                 | 26 Jul–22 Aug 1983                     | Filter pack / Technicon analyser                                                | 0.04–5.6 µg m <sup>-3</sup>  | 8.0   |
| Erisman et al. 1988         | (R) Cabauw, Netherlands–2 m   | 30 daytime and nighttime 12 hr periods | Two denuder tubes and a filterpack / Colorimetry                                | 8.3 µg m <sup>-3</sup>       | 12.0  |
|                             | (R) Cabauw, Netherlands–25 m  |                                        |                                                                                 | 6.2 µg m <sup>-3</sup>       | 8.9   |
|                             | (R) Cabauw, Netherlands–100 m |                                        |                                                                                 | 3.6 µg m <sup>-3</sup>       | 5.2   |
|                             | (R) Cabauw, Netherlands–200 m |                                        |                                                                                 | 2.1 µg m <sup>-3</sup>       | 3.0   |
| Harrison and Allen 1990     | Essex University              | 21 Aug–13 Nov 1986                     | Filter pack / High Performance Liquid Chromatography (HPLC)                     | 1.44±0.49 µg m <sup>-3</sup> | 2.1   |
|                             |                               | 24 Feb–16 Apr 1987                     |                                                                                 | 0.98±0.34 µg m <sup>-3</sup> | 1.4   |
|                             | Colchester                    | 21 Aug–13 Nov 1986                     |                                                                                 | 1.68±0.47 µg m <sup>-3</sup> | 2.4   |
|                             |                               | 24 Feb–16 Apr 1987                     |                                                                                 | 1.26±0.38 µg m <sup>-3</sup> | 1.8   |
|                             | Dedham                        | 21 Aug–13 Nov 1986                     |                                                                                 | 1.91±0.42 µg m <sup>-3</sup> | 2.8   |
|                             |                               | 24 Feb–16 Apr 1987                     |                                                                                 | 2.29±1.96 µg m <sup>-3</sup> | 3.3   |
|                             | Walton Pier                   | 21 Aug–13 Nov 1986                     |                                                                                 | 0.98±0.39 µg m <sup>-3</sup> | 1.4   |
|                             |                               | 24 Feb–16 Apr 1987                     |                                                                                 | 2.90±1.84 µg m <sup>-3</sup> | 4.2   |
| Pio et al. 1991             | Aveiro (Portugal) Urban       | Aug 1988–May 1989                      | Filter pack with potassium hydrogen sulphate                                    | 4.56±2.51 ppbv               | 4.6   |

*continued...*

...continued

| Reference            | Location                    | Period                          | Instrument                                | [NH <sub>3</sub> ]                 | ~ppbv |
|----------------------|-----------------------------|---------------------------------|-------------------------------------------|------------------------------------|-------|
| Lee et al. 1993      | Chicago,IL                  | Apr 1990–Mar 1991 Day           | Annular denuder system (ADS)              | 0.15-5.60 $\mu\text{g m}^{-3}$     | 4.1   |
|                      |                             | Apr 1990–Mar 1991 Night         |                                           | 0.11-8.20 $\mu\text{g m}^{-3}$     | 6.0   |
| Andersen et al. 1993 | Denmark                     | 24–31 May and 29 Aug–5 Sep 1991 | Denuder, filter pack / indophenol blue    | 0–4.5 $\mu\text{g m}^{-3}$         | 3.2   |
| Suh et al. 1995      | Philadelphia,PA average     | 1992                            | Annular denuder                           | 1.18–5.54 ppbv                     | 20.1  |
|                      |                             | 1993                            |                                           | 2.04–5.68 ppbv                     | 3.9   |
|                      | Valley Forge,PA             | 1992                            |                                           | 0.9 $\pm$ 0.9 ppbv                 | 0.9   |
|                      |                             | 1993                            |                                           | 1.4 $\pm$ 1.0 ppbv                 | 1.4   |
|                      | Roxborough,PA               | 1992                            |                                           | 0.6 $\pm$ 0.7 ppbv                 | 0.6   |
|                      |                             | 1993                            |                                           | Unreported                         |       |
|                      | North Airport,PA            | 1992                            |                                           | 0.9 $\pm$ 0.7 ppbv                 | 0.9   |
|                      |                             | 1993                            |                                           | 0.9 $\pm$ 0.7 ppbv                 | 0.9   |
|                      | Camden, NJ                  | 1992                            |                                           | 2.2 $\pm$ 1.1 ppbv                 | 2.2   |
|                      |                             | 1993                            |                                           | 1.9 $\pm$ 1.4 ppbv                 | 1.9   |
|                      | Laboratory,PA               | 1992                            |                                           | 2.2 $\pm$ 1.1 ppbv                 | 2.2   |
|                      |                             | 1993                            |                                           | 2.5 $\pm$ 0.9 ppbv                 | 2.5   |
|                      | Presbyterian,PA             | 1992                            |                                           | 2.6 $\pm$ 1.3 ppbv                 | 2.6   |
|                      |                             | 1993                            |                                           | 3.0 $\pm$ 1.8 ppbv                 | 3.0   |
|                      | 500 S. Broad,PA             | 1992                            |                                           | 3.8 $\pm$ 1.9 ppbv                 | 3.8   |
|                      |                             | 1993                            |                                           | 3.9 $\pm$ 1.1 ppbv                 | 3.9   |
|                      | Temple,PA                   | 1992                            |                                           | 2.6 $\pm$ 1.4 ppbv                 | 2.6   |
|                      |                             | 1993                            |                                           | 2.4 $\pm$ 1.1 ppbv                 | 2.4   |
| Yamamoto et al. 1995 | Yokohama (Japan) Urban      | Jan 1987-Dec 1991               | Boric acid bubbler with Teflon pre-filter | 2.4-11.9 ppbv                      | 2.4   |
| Hoek et al. 1996     | (R) Deurne,Netherlands      | Oct 1987–Apr 1990               | Annular denuder filter pack system (ADS)  | 0.7-11.6-57.6 $\mu\text{g m}^{-3}$ | 16.7  |
|                      | (SR) Bilthoven, Netherlands |                                 |                                           | 0.7-3.9-38.9 $\mu\text{g m}^{-3}$  | 5.6   |

continued...

...continued

| Reference                | Location                                  | Period            | Instrument                                                            | [NH <sub>3</sub> ]                     | ~ppbv |
|--------------------------|-------------------------------------------|-------------------|-----------------------------------------------------------------------|----------------------------------------|-------|
| Brook et al. 1997        | Egbert, Canada                            | 1992–1994         | Annular denuder filter pack system (ADS)                              | 1.632 $\mu\text{g m}^{-3}$             | 2.4   |
|                          | Kejimikujik, Canada                       |                   |                                                                       | 0.408 $\mu\text{g m}^{-3}$             | 0.6   |
|                          | Sutton, Canada                            |                   |                                                                       | 0.833 $\mu\text{g m}^{-3}$             | 1.2   |
|                          | Hamilton, Canada                          |                   |                                                                       | 4.284 $\mu\text{g m}^{-3}$             | 6.2   |
|                          | Windsor, Canada                           |                   |                                                                       | 1.717 $\mu\text{g m}^{-3}$             | 2.5   |
| Burkhardt et al. 1998    | (R) Edinburgh, Scotland                   | Sep 1992-Dec 1992 | Continuous rotating wet annular denuder with Sodium hydrogen sulphate | 1.4 $\mu\text{g m}^{-3}$               | 2.0   |
| Buijsman et al. 1998     | 8 sites in Netherlands Agricultural       | Aug 1992-Jul 1995 | Continuous-flow denuder with Sodium hydrogen sulphate                 | 2-4–10-25 $\mu\text{g m}^{-3}$         | 15.8  |
| Matsumoto and Okita 1998 | Nara, Japan                               | Jun-94            | Annular denuder system (ADS) with Oxalic acid                         | 2.76 $\mu\text{g m}^{-3}$              | 4.0   |
|                          |                                           | Jul-94            |                                                                       | 1.36 $\mu\text{g m}^{-3}$              | 2.0   |
|                          |                                           | Aug-94            |                                                                       | 2.15 $\mu\text{g m}^{-3}$              | 3.1   |
|                          |                                           | Sep-94            |                                                                       | 2.06 $\mu\text{g m}^{-3}$              | 3.0   |
|                          |                                           | Oct-94            |                                                                       | 3.24 $\mu\text{g m}^{-3}$              | 4.7   |
|                          |                                           | Nov-94            |                                                                       | 2.99 $\mu\text{g m}^{-3}$              | 4.3   |
|                          |                                           | Dec-94            |                                                                       | 2.83 $\mu\text{g m}^{-3}$              | 4.1   |
|                          |                                           | Jan-95            |                                                                       | 1.44 $\mu\text{g m}^{-3}$              | 2.1   |
|                          |                                           | Feb-95            |                                                                       | 2.52 $\mu\text{g m}^{-3}$              | 3.6   |
|                          |                                           | Mar-95            |                                                                       | 3.07 $\mu\text{g m}^{-3}$              | 4.4   |
|                          |                                           | Apr-95            |                                                                       | 2.44 $\mu\text{g m}^{-3}$              | 3.5   |
|                          |                                           | May-95            |                                                                       | 2.29 $\mu\text{g m}^{-3}$              | 3.3   |
|                          |                                           | Annual Average    |                                                                       | 2.43 $\mu\text{g m}^{-3}$              | 3.5   |
| McCulloch et al. 1998    | Eastern North Carolina (USA) Agricultural | Sep-Dec 1997      | Annular denuder system (ADS) with Citric acid                         | 10.48 $\pm$ 14.75 $\mu\text{g m}^{-3}$ | 15.1  |
| Wyers & Erisman 1998     |                                           |                   |                                                                       | 5                                      | 5.0   |
| Lee et al. 1999          | Seoul, South Korea                        | Oct 1996–Sep 1997 | Annular denuder                                                       | 6.32                                   | 6.3   |

continued...

...continued

| Reference           | Location                                   | Period             | Instrument                                              | [NH <sub>3</sub> ]                 | ~ppbv |
|---------------------|--------------------------------------------|--------------------|---------------------------------------------------------|------------------------------------|-------|
| McCurdy et al. 1999 | (SU) South Fayette, Pittsburgh, USA        | 13 Jul–9 Oct, 1993 | Short-HEADS annular denuder with Acidic sulphate        | 22.85 ± 25.81 nmol m <sup>-3</sup> | 0.5   |
|                     | (SU) Libertyboro, Pittsburgh, USA          |                    |                                                         | 86.33 ± 55.82 nmol m <sup>-3</sup> | 2.0   |
|                     | (U) Flag Plaza, Pittsburgh, USA            |                    |                                                         | 87.75 ± 48.03 nmol m <sup>-3</sup> | 1.5   |
|                     | (SU) Lawrenceville, Pittsburgh, USA        |                    |                                                         | 50.45 ± 21.43 nmol m <sup>-3</sup> | 0.9   |
| Parmar et al. 2001  | (U) Agra, India                            | Jul-Sep 1997       | Mist chamber technique with Sodium hydrogen sulphate    | 16.4 ± 3.5 ppbv                    | 16.4  |
|                     |                                            | Nov–Feb 1998       |                                                         | 11.8 ± 4.4 ppbv                    | 11.8  |
| Pryor et al. 2001   | (F) Southern Indiana, USA                  | 19 Apr–15 May 1998 | Wet effluent diffusion denuders (WEDD) with Water       | 1.2 ± 1.3 µg m <sup>-3</sup>       | 1.7   |
|                     |                                            | 20 Apr–5 May 1999  |                                                         | 0.26 ± 0.10 µg m <sup>-3</sup>     | 0.4   |
|                     |                                            | 08–19 Jan 1999     |                                                         | 0.65 ± 0.60 µg m <sup>-3</sup>     | 0.9   |
|                     |                                            | 26 Feb–03 Mar 2000 |                                                         | Unreported                         |       |
| Perrino et al. 2002 | (U+Traffic) Piazza Fermi, Rome, Italy      | May 2001-Mar 2002  | Annular diffusion denuders coated with Phosphorous acid | 13.5–21.6 µg m <sup>-3</sup>       | 25.3  |
|                     | (R) Montelibretti, Italy                   | May 2001-Mar 2002  |                                                         | 1.2–3.9 µg m <sup>-3</sup>         | 3.7   |
|                     | (U,Background) Villa Ada Park, Rome, Italy | May 2001-Mar 2002  |                                                         | 2.9–4.9 µg m <sup>-3</sup>         | 5.6   |
| Robarge et al. 2002 | (A) North Carolina, USA                    | Oct 1998-Sep 1999  | Annular denuder system (ADS) with Citric acid           | 5.55 ± 5.35 µg m <sup>-3</sup>     | 8.0   |
| Yao et al. 2003     | Beijing Urban                              | 28 Jul–3 Aug 2001  | Annular Denuder                                         | 16.8–42.2                          | 29.5  |
| Bari et al. 2003    | Manhattan, USA                             | Jul-Sep 1999       | Annular denuder system (ADS) with Citric acid           | 6.1 ± 1.3 µg m <sup>-3</sup>       | 8.8   |
|                     |                                            | Jul 1999-Jun 2000  |                                                         | 5.0 ± 2.7 µg m <sup>-3</sup>       | 7.2   |
|                     |                                            | Jan-Mar 2000       |                                                         | 4.1 ± 2.6 µg m <sup>-3</sup>       | 5.9   |
|                     |                                            | Apr-Jun 2000       |                                                         | 5.9 ± 3.4 µg m <sup>-3</sup>       | 8.5   |
|                     |                                            | Jul 1999-Jun 2000  |                                                         | 3.1 ± 2.6 µg m <sup>-3</sup>       | 4.5   |
|                     |                                            | Jan-Mar 2000       |                                                         | 2.1 ± 2.1 µg m <sup>-3</sup>       | 3.0   |

continued...

...continued

| Reference              | Location                         | Period                   | Instrument           | [NH <sub>3</sub> ]           | ~ppbv |
|------------------------|----------------------------------|--------------------------|----------------------|------------------------------|-------|
|                        |                                  | Apr-Jun 2000             |                      | 4.2 ± 2.6 µg m <sup>-3</sup> | 6.0   |
| Carmichael et al. 2003 | (R) Waliguan Mountain, China     | Sep 1999-Jun 2001        | IVL passive samplers | 4 ppbv                       | 4.0   |
|                        | (R) Linan, China                 | 1 month passive sampling |                      | 5 ppbv                       | 5.0   |
|                        | (R) Shang dian Zhi, China        |                          |                      | 3 ppbv                       | 3.0   |
|                        | (R) Cape D'Aequier, China        |                          |                      | 1 ppbv                       | 1.0   |
|                        | (R) Shui-Li, Taiwan              |                          |                      | 7 ppbv                       | 7.0   |
|                        | (R) Oki, Japan                   |                          |                      | <1 ppbv                      | <1    |
|                        | (R) Tanah Rata, Malaysia         |                          |                      | <1 ppbv                      | <1    |
|                        | (R) Lawa Mandau, Malaysia        |                          |                      | <1 ppbv                      | <1    |
|                        | (R) Bukit Kototabang, Indonesia  |                          |                      | 3 ppbv                       | 3.0   |
|                        | (R) Kalimantan, Indonesia        |                          |                      | 6 ppbv                       | 6.0   |
|                        | (R) Chiang Mai, Thailand         |                          |                      | 2 ppbv                       | 2.0   |
|                        | (R) N. Sri Thammarat, Thailand   |                          |                      | 1 ppbv                       | 1.0   |
|                        | (R) Luang Prabang, Laos          |                          |                      | 3 ppbv                       | 3.0   |
|                        | (R) Savannaketh, Laos            |                          |                      | 1 ppbv                       | 1.0   |
|                        | (R) Mt. Sto. Thomas, Philippines |                          |                      | 2 ppbv                       | 2.0   |
|                        | (R) Dhangadi, Nepal              |                          |                      | 22 ppbv                      | 22.0  |
|                        | (R) Nagarkot, Nepal              |                          |                      | 2 ppbv                       | 2.0   |
|                        | (R) Langtang, Nepal              |                          |                      | 1 ppbv                       | 1.0   |
|                        | (R) Berhampur, India             |                          |                      | 8 ppbv                       | 8.0   |
|                        | (R) Cochin, India                |                          |                      | 19 ppbv                      | 19.0  |
|                        | (R) Agra, India                  |                          |                      | >40 ppbv                     | >40   |
|                        | (R) Bhubaneshwar, India          |                          |                      | 7 ppbv                       | 7.0   |
|                        | (R) Mt. Kenya, Kenya             |                          |                      | 1 ppbv                       | 1.0   |
|                        | (R) Elandsfontein, South Africa  |                          |                      | 2 ppbv                       | 2.0   |
|                        | (R) Cape Point, South Africa     |                          |                      | 1 ppbv                       | 1.0   |
|                        | (R) Tamanrasset, Algeria         |                          |                      | 4 ppbv                       | 4.0   |

continued...

...continued

| Reference          | Location                               | Period            | Instrument                                                           | [NH <sub>3</sub> ]      | ~ppbv |
|--------------------|----------------------------------------|-------------------|----------------------------------------------------------------------|-------------------------|-------|
|                    | (R) Banizoumbou                        |                   |                                                                      | 4 ppbv                  | 4.0   |
|                    | (R) Lamto                              |                   |                                                                      | 3 ppbv                  | 3.0   |
|                    | (R) Zoetele                            |                   |                                                                      | 2 ppbv                  | 2.0   |
|                    | (R) Petit Saut                         |                   |                                                                      | <1 ppbv                 | <1    |
|                    | (R) Isla Redonda, Argentina            |                   |                                                                      | <1 ppbv                 | <1    |
|                    | (R) Ushuaia                            |                   |                                                                      | <1 ppbv                 | <1    |
|                    | (R) El Tololo                          |                   |                                                                      | <1 ppbv                 | <1    |
|                    | (R) Arembepé, Brazil                   |                   |                                                                      | <1 ppbv                 | <1    |
|                    | (R) Marcaomacocha                      |                   |                                                                      | 3 ppbv                  | 3.0   |
|                    | (R) Camkoru                            |                   |                                                                      | <1 ppbv                 | <1    |
| Cape et al. 2004   | (U) Edinburgh, Scotland                | Apr 2002          | Passive samplers (CEH ALPHA) with Phosphorous acid                   | 4.75 µg m <sup>-3</sup> | 6.8   |
| van Pul 2004       | (U+R) 155 sites in Netherlands         | Sep 2000-Sep 2001 | Passive samplers with Phosphorous acid (Duyzer and Weststrate, 2002) | 6.6 µg m <sup>-3</sup>  | 9.5   |
| Walker et al. 2004 | (A) Clinton, North Carolina, USA       | Winter 2000       | Annular denuder system (ADS) with Citric acid                        | 2.59 µg m <sup>-3</sup> | 3.7   |
|                    |                                        | Spring 2000       |                                                                      | 4.62 µg m <sup>-3</sup> | 6.7   |
|                    |                                        | Summer 2000       |                                                                      | 6.18 µg m <sup>-3</sup> | 8.9   |
|                    |                                        | Fall 2000         |                                                                      | 2.85 µg m <sup>-3</sup> | 4.1   |
|                    | (U) Kinston, North Carolina, USA       | Winter 2000       |                                                                      | 0.49 µg m <sup>-3</sup> | 0.7   |
|                    |                                        | Spring 2000       |                                                                      | 3.93 µg m <sup>-3</sup> | 5.7   |
|                    |                                        | Summer 2000       |                                                                      | 2.72 µg m <sup>-3</sup> | 3.9   |
|                    |                                        | Fall 2000         |                                                                      | 0.86 µg m <sup>-3</sup> | 1.2   |
|                    | (U) Morehead city, North Carolina, USA | Winter 2000       |                                                                      | 0.33 µg m <sup>-3</sup> | 0.5   |
|                    |                                        | Spring 2000       |                                                                      | 0.40 µg m <sup>-3</sup> | 0.6   |
|                    |                                        | Summer 2000       |                                                                      | 0.72 µg m <sup>-3</sup> | 1.0   |
|                    |                                        | Fall 2000         |                                                                      | 0.35 µg m <sup>-3</sup> | 0.5   |

continued...

...continued

| Reference                      | Location                 | Period                   | Instrument                                                   | [NH <sub>3</sub> ]             | ~ppbv |
|--------------------------------|--------------------------|--------------------------|--------------------------------------------------------------|--------------------------------|-------|
| Vogt et al. 2005               | (U+A) Munster, Germany   | May-Jun 2004             | Continuous-flow wet denuder (AMANDA) with NaHSO <sub>4</sub> | 5.2 ppbv                       | 5.2   |
| Yao et al. 2006                | (U) Hongkong             | Autumn 2000              | Autoanalyser                                                 | 3 ppbv                         | 3.0   |
| Lin et al. 2006                | (U) Taichung, Taiwan     | Jan.-Dec. 2002           | Filter,denuder / IC                                          | 12.2 ± 4.31 ppbv               | 12.2  |
| Anatolaki and Tsitouridou 2007 | (U) Thessaloniki, Greece | Apr 2002-Mar 2003        | Annular denuder system (ADS) with Citric acid                | 2.33 ± 1.46 µg m <sup>-3</sup> | 2.3   |
| Wilson and Serre 2007          | (A) North Carolina, USA  | Oct 2003–Dec 2003        | Passive sampler with Phosphorous acid                        | 10 ppbv                        | 10.0  |
|                                |                          | Jan 2003–Mar 2004        |                                                              | 8.1 ppbv                       | 8.1   |
|                                |                          | Apr 2004–Jun 2004        |                                                              | 10.9 ppbv                      | 10.9  |
|                                |                          | Jul 2004–Sep 2004        |                                                              | 16.7 ppbv                      | 16.7  |
| Alebic-Juretic 2008            | (U+Industrial) Croatia   | Winter seasons 2000-2002 | Spectrophotometrically by Nesslerization (WHO, 1976)         | 16.3 µg m <sup>-3</sup>        | 23.5  |
|                                |                          | Spring seasons 2000-2002 |                                                              | 12.3 µg m <sup>-3</sup>        | 17.7  |
|                                |                          | Summer seasons 2000-2002 |                                                              | 9.3 µg m <sup>-3</sup>         | 13.4  |
|                                |                          | Fall seasons 2000-2002   |                                                              | 15.7 µg m <sup>-3</sup>        | 22.6  |
|                                | (U+Residential) Croatia  | Winter seasons 2000-2002 |                                                              | 20.3 µg m <sup>-3</sup>        | 29.2  |
|                                |                          | Spring seasons 2000-2002 |                                                              | 37.8 µg m <sup>-3</sup>        | 54.4  |
|                                |                          | Summer seasons 2000-2002 |                                                              | 44.9 µg m <sup>-3</sup>        | 64.7  |
|                                |                          | Fall seasons 2000-2002   |                                                              | 20.3 µg m <sup>-3</sup>        | 29.2  |
|                                |                          | 1983–2005 Annual average |                                                              | 6–14 µg m <sup>-3</sup>        | 14.4  |
|                                |                          | 1983–2005 Annual average |                                                              | 12–20 µg m <sup>-3</sup>       | 23.0  |
| Biswas et al. 2008             | (U) Lahore, Pakistan     | Dec 2005–Feb 2006        | Annular denuder                                              | 30.3-116.9 ppbv                | 73.6  |
| M. Hu et al. 2008              | (R) Guangzhou, China     | 4 Oct–4 Nov 2004         | Wet-rotating annular denuder with Sodium Carbonate           | 10.5 ppbv                      | 10.5  |
| Cao et al. 2009                | (U) Xian, China          | 2006.04 yo 2007.04       | Passive sampler                                              | 18.6                           | 18.6  |
|                                | (Suburban) Xian, China   | 2006.04–2007.05          | Passive sampler                                              | 20.3                           | 20.3  |
| Wu et al. 2009                 | (U) Beijing, China       | Summer 2002–2003         | Annular denuder                                              | 23.9                           | 23.9  |

continued...



...continued

| Reference              | Location                | Period                   | Instrument                                                              | [NH <sub>3</sub> ]               | ~ppbv |
|------------------------|-------------------------|--------------------------|-------------------------------------------------------------------------|----------------------------------|-------|
| Fountoukis et al. 2009 | (U) Mexico city, Mexico | 21–30 Mar 2006           | Quantum Laser (QCL) Spectrometer                                        | 17.73±11.02 $\mu\text{g m}^{-3}$ | 25.5  |
| Behera and Sharma 2010 | (U) Colonelganj, India  | 1 Dec, 2007–31 Jan, 2008 | Chemiluminescence (Seres CV 2000 G online NOx-NH <sub>3</sub> analyzer) | 26.4±5.8 $\mu\text{g m}^{-3}$    | 38.0  |
|                        |                         | 8 Apr–30 Jun, 2007       |                                                                         | 28.7±7.3 $\mu\text{g m}^{-3}$    | 41.3  |
|                        | (U) IIT Kanpur, India   | 1 Dec, 2007–31 Jan, 2008 |                                                                         | 16.3±5.0 $\mu\text{g m}^{-3}$    | 23.5  |
|                        |                         | 8 Apr–30 Jun, 2007       |                                                                         | 18.0±3.9 $\mu\text{g m}^{-3}$    | 25.9  |
| Ianniello et al. 2010  | (U) Beijing, China      | 23 Jan–14 Feb 2007       | Annular diffusion denuder with Phosphorous acid                         | 5.47±3.75 $\mu\text{g m}^{-3}$   | 7.9   |
|                        |                         | 2–31 Aug 2007            |                                                                         | 25.39±6.91 $\mu\text{g m}^{-3}$  | 36.6  |
| Z.-Y. Meng et al. 2010 | (R) Longfengshan, China | 2007                     | Ogawa passive sampler                                                   | 4.9±4.0 ppbv                     | 4.9   |
|                        |                         | 2008                     |                                                                         | 6.6±5.4 ppbv                     | 6.6   |
|                        | (R) Shangdianzi, China  | 2007                     |                                                                         | 2.2±2.3 ppbv                     | 2.2   |
|                        |                         | 2008                     |                                                                         | 3.5±3.5 ppbv                     | 3.5   |
|                        | (R) Waliguan, China     | 2007                     |                                                                         | 4.0±3.6 ppbv                     | 4     |
|                        |                         | 2008                     |                                                                         | 4.1±2.2 ppbv                     | 4.1   |
|                        | (R) Houma, China        | 2007                     |                                                                         | 13.9±7.7 ppbv                    | 13.9  |
|                        |                         | 2008                     |                                                                         | 13.6±9.5 ppbv                    | 13.6  |
|                        | (R) Huai'an, China      | 2007                     |                                                                         | 13.3±9.6 ppbv                    | 13.3  |
|                        |                         | 2008                     |                                                                         | 14.1±8.6 ppbv                    | 14.1  |
|                        | (R) Linan, China        | 2007                     |                                                                         | 2.3±2.3 ppbv                     | 2.3   |
|                        |                         | 2008                     |                                                                         | 6.4±6.0 ppbv                     | 6.4   |
|                        | (R) Kaili, China        | 2007                     |                                                                         | 6.4±4.4 ppbv                     | 6.4   |
|                        |                         | 2008                     |                                                                         | 18.4±16.1 ppbv                   | 18.4  |
|                        | (R) Chenzhou, China     | 2007                     |                                                                         | 4.1±4.8 ppbv                     | 4.1   |
|                        |                         | 2008                     |                                                                         | 6.5±5.9 ppbv                     | 6.5   |
|                        | (R) Meixian, China      | 2007                     |                                                                         | 6.2±1.9 ppbv                     | 6.2   |
|                        |                         | 2008                     |                                                                         | 6.8±4.8 ppbv                     | 6.8   |

continued...

...continued

| Reference                    | Location                          | Period                  | Instrument                                                    | [NH <sub>3</sub> ]          | ~ppbv |
|------------------------------|-----------------------------------|-------------------------|---------------------------------------------------------------|-----------------------------|-------|
|                              | (R) Dianbai, China                | 2007                    |                                                               | 9.7±9.4 ppbv                | 9.7   |
|                              |                                   | 2008                    |                                                               | 11.9±8.5 ppbv               | 11.9  |
| Ianniello et al. 2010        | (U) Beijing, China                | Winter and Summer 2007  | Annular denuder                                               | 0.29–63.8                   | 32.0  |
| L. Gong et al. 2011          | (U) Houston, TX                   | 12 Feb 2010–1 Mar 2010  | External cavity quantum cascade laser (EC-QCL)                | 2.4±1.2 ppbv                | 2.4   |
|                              |                                   | Aug 2010 to 25 Sep 2010 |                                                               | 3.1±2.9 ppbv                | 3.1   |
| Z. Y. Meng et al. 2011       | (U) Beijing, China                | 2007.1.23–2.14          | Annular denuder                                               | 7.21 ± 4.94 ppbv            | 7.2   |
|                              |                                   | 2007.8.2–31             |                                                               | 33.46 ± 9.11 ppbv           | 33.5  |
| Schaap et al. 2011           | (R) Netherlands                   | Aug. 2007 and 2008      | MARGA                                                         | 12.9 ppbv                   | 12.9  |
| Shen et al. 2011             | North China Plain                 | Aug.2006-Jul.2007       | Passive Sampler                                               | 21.1±10.5 ppbv              | 21.1  |
| Z. Y. Meng et al. 2011       | (U) Beijing, China                | Feb 2008–Jul 2010       | Ogawa passive sampler                                         | 22.8±16.3 ppbv              | 22.8  |
|                              | (R) Beijing, China                | Jan 2007–Jul 2010       |                                                               | 10.2±10.8 ppbv              | 10.2  |
| Makkonen et al. 2012         | (U) Helsinki, Finland             | Spring 2010             |                                                               | 0.40±0.59 ppbv              | 0.4   |
| Pandolfi et al. 2012         | (U+T) Barcelona, Spain            | May–Sep 2011            | Online AiRRmonia                                              | 2.2±1.0 µg m <sup>-3</sup>  | 3.2   |
|                              | (U) City Center, Barcelona, Spain |                         |                                                               | 5.6±2.1 µg m <sup>-3</sup>  | 8.1   |
| J.-S. Kim et al. 2012        | (A,U) Gwangju, South Korea        | Mar-07                  | Semi-continuous diffusion scrubber with fluorescent detection | ~3.1±1.2 µg m <sup>-3</sup> | 4.5   |
|                              |                                   | Apr-07                  |                                                               | ~2.5±1.5 µg m <sup>-3</sup> | 3.6   |
|                              |                                   | Jul-07                  |                                                               | ~2.4±0.7 µg m <sup>-3</sup> | 3.5   |
|                              |                                   | Sep-07                  |                                                               | ~1.4±1.0 µg m <sup>-3</sup> | 2.0   |
| Zbieranowski and Aherne 2012 | (A) Southern Ontario, Canada      | Aug 2007–Apr 2009       | Willems badge diffusive passive sampler with Tartaric acid    | 1.39 µg m <sup>-3</sup>     | 2.0   |
| Heald et al. 2012            | US: 13 sites                      | 2004, 2009              | MAMN URG annular denuder/filter pack                          | up to 12 µg m <sup>-3</sup> | 4.5   |
| Reche et al. 2012            | (U+T) Barcelona, Spain            | Jul 2010                | Passive sampler (CEH ALPHA) with Phosphorous acid             | 7.6 µg m <sup>-3</sup>      | 10.9  |
|                              |                                   | Jan 2011                |                                                               | 4.6 µg m <sup>-3</sup>      | 6.6   |
|                              | (U) Barcelona, Spain              | Jul 2010                |                                                               | 10.6 µg m <sup>-3</sup>     | 15.3  |
|                              |                                   | Jan 2011                |                                                               | 3.9 µg m <sup>-3</sup>      | 5.6   |

continued...

...continued

| Reference                   | Location                           | Period                       | Instrument                                                                                      | [NH <sub>3</sub> ]                  | ~ppbv |
|-----------------------------|------------------------------------|------------------------------|-------------------------------------------------------------------------------------------------|-------------------------------------|-------|
|                             | (R) Barcelona, Spain               | Jul 2010                     |                                                                                                 | 1.9 $\mu\text{g m}^{-3}$            | 2.7   |
| Behera et al. 2013          | (U) Singapore                      | Sep.-Nov. 2011               |                                                                                                 | 3.6 ppbv                            | 5.2   |
| Longwen Gong et al. 2013    | (U) Houston, TX                    | Aug-10                       |                                                                                                 | 3.0 $\pm$ 2.5                       | 3.0   |
| Hassan et al. 2013          | (S) Cairo, Egypt                   | Summer 2009                  |                                                                                                 | 64.7                                | 64.7  |
| X. H. Yao and L. Zhang 2013 | (L) Southern Ontario, Canada       | Jun 2006–Mar 2007            | Ogawa passive sampler and custom passive samplers                                               | 3.6–6.1 $\mu\text{g m}^{-3}$        | 7.0   |
|                             | (A) Southern Ontario, Canada       |                              |                                                                                                 | 1–3 $\mu\text{g m}^{-3}$            | 2.9   |
|                             | (R) Southern Ontario, Canada       |                              |                                                                                                 | <0.4 $\mu\text{g m}^{-3}$           | 0.6   |
| Q. Hu et al. 2014           | (U) Toronto, Canada                | Jul 2003–Sep 2011            | Denuder, passive sampler / IC, Gas Particle IC                                                  | 0–2.5–14.7 ppbv                     | 2.5   |
|                             |                                    | Summer                       |                                                                                                 | 3.9 $\pm$ 1.6 ppbv                  | 3.9   |
|                             |                                    | Winter                       |                                                                                                 | 1.1 $\pm$ 0.6 ppbv                  | 1.1   |
| Sharma et al. 2014          | (U) National Capital Region, India | Jan 2010–Jun 2012 Daytime    | Chemiluminescence NH <sub>3</sub> -Analyzer (Model: CLD88CYp, M/s. ECO Physics AG, Switzerland) | 19.3 $\pm$ 1.5 ppbv                 | 19.3  |
|                             |                                    | Jan 2010–Jun 2012 Night-time |                                                                                                 | 21.9 $\pm$ 1.8 ppbv                 | 21.9  |
| Li et al. 2014              | (R) Boulder, Wyoming               | Dec.2006-Dec.2011            | Denuder, filter / IC                                                                            | 0.24                                | 0.2   |
| Meng 2014                   | (R) Linan, China                   | 1 Jan–31 Dec 2010            | Ogawa passive sampler                                                                           | 16.5 $\pm$ 11.2 ppbv                | 16.5  |
| Sudheer and Rengarajan 2015 | (U) Ahmedabad, India               | Jun 5–Jul 4, 2012            | AIM–IC, URG 9000D.                                                                              | 10.5 $\pm$ 3.5 $\mu\text{g m}^{-3}$ | 10.5  |
|                             |                                    | Dec 22, 2011–Jan 16, 2012    |                                                                                                 | 11.6 $\pm$ 5.0 $\mu\text{g m}^{-3}$ | 11.6  |
| Wang et al. 2015            | Shanghai, China Urban              | Jul 2013 ? Sep 2014          | DOAS                                                                                            | 6.2 $\pm$ 4.6 ppbv (1–54.5 ppbv)    | 6.2   |
|                             | Shanghai, China Rural              | Jul–Dec 2013, Mar–Jun 2014   | MARGA                                                                                           | 12.4 $\pm$ 9.1 ppbv (1–79.4 ppbv)   | 12.4  |
|                             | Shanghai, China Industrial         | Jan–Jun 2014                 | DOAS                                                                                            | 17.6 $\pm$ 9.5 ppbv                 | 17.6  |
| Chang et al. 2016           | Shanghai, China                    | 3 Apr 2014–2 Apr 2015        | MARGA                                                                                           | 5.5 $\pm$ 3.9 $\mu\text{g m}^{-3}$  | 7.9   |
|                             |                                    | Spring                       |                                                                                                 | 5.1 $\pm$ 3.8 $\mu\text{g m}^{-3}$  | 7.3   |
|                             |                                    | Summer                       |                                                                                                 | 7.3 $\pm$ 4.9 $\mu\text{g m}^{-3}$  | 10.5  |
|                             |                                    | Autumn                       |                                                                                                 | 4.5 $\pm$ 2.3 $\mu\text{g m}^{-3}$  | 6.5   |

continued...

...continued

| Reference                     | Location                               | Period              | Instrument                                               | [NH <sub>3</sub> ]           | ~ppbv |
|-------------------------------|----------------------------------------|---------------------|----------------------------------------------------------|------------------------------|-------|
|                               |                                        | Winter              |                                                          | 5.0 ± 3.4 µg m <sup>-3</sup> | 7.2   |
| X. Yao and Leiming Zhang 2016 | (R) North America                      | 2006–2015 (Varying) | NAPS, CAPMoN and AMoN                                    | 0.3–0.5 ppbv                 | 0.4   |
|                               | (U) North America                      | 2007–2015 (Varying) |                                                          | 1.6–2.6 ppbv                 | 2.1   |
|                               | (A) North America                      | 2008–2015 (Varying) |                                                          | 0.8–4.9 ppbv                 | 2.9   |
| Li et al. 2017                | 14 Sites across Northern Colorado, USA | Summer 2010–2015    | Radiello passive samplers + IASI + CMAQ                  | 2.66–42.7 µg m <sup>-3</sup> | 32.7  |
| Zhaoyang Meng et al. 2017     | (R) Gucheng, North China Plain         | 15 May–25 Sep 2013  | Off-Axis Integrated Cavity Output Spectroscopy (OA-ICOS) | 36.2±56.4 ppbv               | 36.2  |
|                               |                                        | 1 May–30 May 2013   |                                                          | ~37.8 ppbv                   | 37.8  |
|                               |                                        | 1 Jun–30 Jun 2013   |                                                          | 28.4 ppbv                    | 28.4  |
|                               |                                        | 1 Jul–31 Jul 2013   |                                                          | 73.9 ppbv                    | 73.9  |
|                               |                                        | 1 Aug–31 Aug 2013   |                                                          | 26.4 ppbv                    | 26.4  |
|                               |                                        | 1 Sep–30 Sep 2013   |                                                          | 13.5 ppbv                    | 13.5  |
| Teng et al. 2017              | (U) Qingdao, China                     | Mid-Nov–Dec 2015    | Off-Axis Integrated Cavity Output Spectroscopy (OA-ICOS) | 0.3–2.4–10.8 ppbv            | 2.4   |
| Zanten et al. 2017            | Netherlands: 16 Sites                  | 1998–2014           | AMORs Continuous flow denuder AMANDA                     | 2–20 µg m <sup>-3</sup>      | 15.8  |
| Tang et al. 2018              | UK: 85 sites                           | 1998–2014           | Integrated Passive + Active                              | up to 22 µg m <sup>-3</sup>  | 31.7  |
| Nair et al. 2019              | US: 90 sites                           | 2007–2017           | AMoN passive samplers                                    | 0–40 ppbv                    | 5.0   |

continued...

...continued

| Reference                    | Location                           | Period                  | Instrument                                                                                          | [NH <sub>3</sub> ]          | ~ppbv |
|------------------------------|------------------------------------|-------------------------|-----------------------------------------------------------------------------------------------------|-----------------------------|-------|
| <i>Aircraft Measurements</i> |                                    |                         |                                                                                                     |                             |       |
| Georgii and Müller 1974      | Bavaria, Germany                   | Nov 1969–Sept 1972      | Automated Wet Chemical Methods                                                                      | Upto 20 µg m <sup>-3</sup>  | 28.8  |
| LeBel et al. 1985            | Coastal Virginia and Maryland, USA | Mar and Sep 1983        | Tungsten Oxide Denuder System                                                                       | 0.1–1 ppbv                  | 1.0   |
|                              | North Atlantic ocean               | Aug 1983                |                                                                                                     | 0.5–1.2 ppbv                | 1.2   |
| Alkezweeny et al. 1986       | Kentucky, USA                      | Summer 1983             | Tungsten Oxide Denuder System                                                                       | 0.04–5.6 µg m <sup>-3</sup> | 4.1   |
| Ziereis and Arnold 1986      | Federal Republic of Germany        | 11, 14, and 15 May 1985 | Modified Ion Mass Spectrometer                                                                      | 8x10 <sup>-5</sup> –2 ppbv  | 2.0   |
| Yokelson et al. 1999         | North Carolina, USA                | Apr 1997                | Airborne Fourier Transform Infrared Spectrometer                                                    | 0.023–0.088 ppm fire        | 50    |
| Nowak et al. 2007            | New York City and Georgia, USA     | Jul–Aug 2004            | CIMS                                                                                                |                             |       |
| Nowak et al. 2010            | Houston, USA                       | 16 Sep–13 Oct 2006      | CIMS                                                                                                |                             |       |
| Nowak et al. 2012            | California, USA                    | 4 May–20 Jun 2010       | CIMS                                                                                                |                             |       |
| Langridge et al. 2012        | Los Angeles, USA                   |                         | CIMS                                                                                                |                             |       |
| Leen et al. 2013             | Washington, USA                    | 24–25 May 2012          | Mid-infrared off-axis ICOS spectrometer                                                             | 1.6–103 ppbv                | 50.0  |
| Schiferl et al. 2014         | California, USA                    | May and Jun 2010        | CIMS (CalNex) and GEOS-Chem                                                                         | Upto 20 ppbv                | 20.0  |
| Müller et al. 2014           | Fresno, California, USA            | Jan/Feb 2013            | Proton Transfer Reaction Time-Of-Flight Mass Spectrometer                                           | Upto 60 ppbv                | 60.0  |
| Shephard et al. 2015         | Canadian oil sands, Canada         | 3 and 5 Sep 2013        | Dual Quantum Cascade Laser and high-resolution time-of-flight chemical ionization mass spectrometer | 1.2±0.2 ppbv                | 1.2   |
| Sun et al. 2015              | California, USA                    | 21, 28, and 30 Jan 2013 | Cavity Ring Down Spectrometer And A Proton Transfer Reaction Time-Of-Flight Mass Spectrometer       | 5–80 ppbv                   | 42.5  |

continued...

...continued

| Reference                    | Location                                        | Period            | Instrument            | [NH <sub>3</sub> ]                    | ~ppbv     |
|------------------------------|-------------------------------------------------|-------------------|-----------------------|---------------------------------------|-----------|
| <i>Ocean Transects</i>       |                                                 |                   |                       |                                       |           |
| Georgii and Gravenhorst 1977 | North Sea, English Channel                      | Oct-73            | Unspecified           | 42–180 nmol m <sup>-3</sup>           | 26.7      |
|                              | Azores                                          |                   |                       | 50–170 nmol m <sup>-3</sup>           | 26.5      |
|                              | Tropical Atlantic                               |                   |                       | 11–60 nmol m <sup>-3</sup>            | 8.5       |
|                              | Caribbean                                       |                   |                       | 220 nmol m <sup>-3</sup>              | 52.9      |
|                              | Sargasso Sea                                    |                   |                       | 110–500 nmol m <sup>-3</sup>          | 73.4      |
| Ayers and Gras 1980          | Cape Grim                                       |                   |                       | 3.5 nmol m <sup>-3</sup>              | 0.8       |
| Quinn et al. 1990            | Central Pacific                                 |                   |                       | 0.67 nmol m <sup>-3</sup>             | 0.2       |
| Ottley and Harrison 1992     | Southern North Sea                              |                   |                       | 2–88 nmol m <sup>-3</sup>             | 10.8      |
| Gibb et al. 1999             | Coastal Arabian Sea                             |                   |                       | 3.8 nmol m <sup>-3</sup>              | 0.9       |
|                              | Remote Arabian Sea                              |                   |                       | 1 nmol m <sup>-3</sup>                | 0.2       |
| Johnson et al. 2008          | Northeast Atlantic                              | Autumn            | Filter pack + FIGD-IC | 1.4–8.0 nmol m <sup>-3</sup> (4.5)    | 1.1       |
|                              | Northern North Sea                              | Winter            | Filter pack + OPA     | 1.4–5.5 nmol m <sup>-3</sup> (2.9)    | 0.7       |
|                              | Norwegian Sea/ Arctic Ocean                     | Spring–Summer     | Filter pack + OPA     | 1.4–15.9 nmol m <sup>-3</sup> (7.5)   | 1.8       |
|                              | Irminger Basin                                  | Winter            | Filter pack + OPA     | 5.5–25.8 (n = 2) nmol m <sup>-3</sup> | 3.8       |
| Wentworth et al. 2016        | Baffin Bay/ Eastern Canadian Arctic Archipelago | 13 Jul–7 Aug 2014 | AIM-Ion Chromatograph | 30–650 ng/m <sup>3</sup>              | 0.04–0.87 |

Table S2: Gas-Aerosol Equilibrium Models used in Chemical Transport Models.

| Reference                       | Model        | Species                                                                 | Temperature Dependence                                                                          |
|---------------------------------|--------------|-------------------------------------------------------------------------|-------------------------------------------------------------------------------------------------|
| M. Bassett and Seinfeld 1983    | EQUIL        | Sulfate, nitrate, ammonium, water                                       | Chemical potentials, solute activity, water activity                                            |
| M. E. Bassett and Seinfeld 1984 | KEQUIL       | —"—                                                                     | Chemical potentials, solute activity, water activity                                            |
| Saxena et al. 1986              | MARS         | —"—                                                                     | Equilibrium constants                                                                           |
| Pilinis and Seinfeld 1987       | SEQUILIB     | —"— + sodium, chloride                                                  | Equilibrium constants                                                                           |
| Wexler and Seinfeld 1991        | AIM          | —"—                                                                     | Chemical potentials, DRHs                                                                       |
| Y. P. Kim et al. 1993           | SCAPE        | —"—                                                                     | Equilibrium constants, DRHs                                                                     |
| Jacobson et al. 1996            | EQUISOLV     | —"— + bisulfate                                                         | Equilibrium constants, DRHs, activity coefficients                                              |
| Kim and Seinfeld 1995           | SCAPE2       | —"— + potassium, calcium, magnesium, carbonate                          | Equilibrium constants, DRHs                                                                     |
| Zhaoyue Meng et al. 1995        |              |                                                                         |                                                                                                 |
| Binkowski and Shankar 1995      | MARS-A       | Sulfate, nitrate, ammonium, water                                       | Equilibrium constants                                                                           |
| Nenes et al. 1998               | ISORROPIA    | —"— + sodium, chloride                                                  | Equilibrium constants                                                                           |
| Clegg et al. 1998               | AIM2         | —"—                                                                     | Equilibrium constants, chemical potentials, DRHs, activities, solubilities, and freezing points |
| Jacobson 1999                   | EQUISOLV II  | —"— + potassium, calcium, magnesium, carbonate                          | Equilibrium constants, DRHs, activity coefficients                                              |
| Ansari 1999                     | GFEMN        | —"—                                                                     | Chemical potentials                                                                             |
| Zaveri et al. 2005              | MESA         | Sulfate, nitrate, ammonium, sodium, chloride, calcium, bisulfate, water | Equilibrium constants                                                                           |
| Topping et al. 2005             | ADDEM        | —"—                                                                     | Chemical potentials, equilibrium constants, Kelvin effect                                       |
| Amundson et al. 2006            | UHAERO       | Sulfate, nitrate, ammonium, sodium, chloride, water                     | Equilibrium constants                                                                           |
| Fountoukis and Nenes 2007       | ISORROPIA-II | —"— + potassium, calcium, magnesium                                     | Equilibrium constants                                                                           |
| Friese and Ebel 2010            | eAIM         | Sulfate, nitrate, ammonium, chloride, sodium, water                     | Equilibrium constants, chemical potentials, DRHs, activities, solubilities, and freezing points |

# References

- Alebic-Juretic, Ana. 2008. "Airborne ammonia and ammonium within the Northern Adriatic area, Croatia." *Environmental Pollution* 154 (3): 439–447. doi:[10.1016/j.envpol.2007.11.029](#).
- Alkezweeny, A.J., G.L. Laws, and W. Jones. 1986. "Aircraft and ground measurements of ammonia in Kentucky." *Atmospheric Environment (1967)* 20 (2): 357–360. doi:[10.1016/0004-6981\(86\)90038-7](#).
- Amundson, N. R., A. Caboussat, J. W. He, A. V. Martynenko, V. B. Savarin, J. H. Seinfeld, and K. Y. Yoo. 2006. "A new inorganic atmospheric aerosol phase equilibrium model (UHAERO)." *Atmospheric Chemistry and Physics* 6 (4): 975–992. doi:[10.5194/acp-6-975-2006](#).
- Anatolaki, Ch., and R. Tsitouridou. 2007. "Atmospheric deposition of nitrogen, sulfur and chloride in Thessaloniki, Greece." *Atmospheric Research* 85 (3-4): 413–428. doi:[10.1016/j.atmosres.2007.02.010](#).
- Andersen, Helle Vibeke, Mads F Hovmand, Poul Hummelshøj, and Niels Otto Jensen. 1993. "Measurements of ammonia flux to a spruce stand in Denmark." *Atmospheric Environment. Part A. General Topics* 27 (2): 189–202. doi:[10.1016/0960-1686\(93\)90350-8](#).
- Ansari, A. 1999. "Prediction of multicomponent inorganic atmospheric aerosol behavior." *Atmospheric Environment* 33 (5): 745–757. doi:[10.1016/s1352-2310\(98\)00221-0](#).
- Ayers, G. P., and J. L. Gras. 1980. "Ammonia gas concentrations over the Southern Ocean." *Nature* 284 (5756): 539–540. doi:[10.1038/284539a0](#).
- Bari, Abdul, Vincent Ferraro, Lloyd R. Wilson, Dan Luttinger, and Liaquat Husain. 2003. "Measurements of gaseous HONO, HNO<sub>3</sub>, SO<sub>2</sub>, HCl, NH<sub>3</sub>, particulate sulfate and PM<sub>2.5</sub> in New York, NY." *Atmospheric Environment* 37 (20): 2825–2835. doi:[10.1016/s1352-2310\(03\)00199-7](#).
- Bassett, Mark E., and John H. Seinfeld. 1984. "Atmospheric equilibrium model of sulfate and nitrate aerosols—II. Particle size analysis." *Atmospheric Environment (1967)* 18 (6): 1163–1170. doi:[10.1016/0004-6981\(84\)90147-1](#).
- Bassett, Mark, and John H. Seinfeld. 1983. "Atmospheric equilibrium model of sulfate and nitrate aerosols." *Atmospheric Environment (1967)* 17 (11): 2237–2252. doi:[10.1016/0004-6981\(83\)90221-4](#).
- Behera, Sailesh N., Raghu Betha, and Rajasekhar Balasubramanian. 2013. "Insights into Chemical Coupling among Acidic Gases, Ammonia and Secondary Inorganic Aerosols." *Aerosol and Air Quality Research* 13 (4): 1282–1296. doi:[10.4209/aaqr.2012.11.0328](#).
- Behera, Sailesh N., and Mukesh Sharma. 2010. "Investigating the potential role of ammonia in ion chemistry of fine particulate matter formation for an urban environment." *Science of The Total Environment* 408 (17): 3569–3575. doi:[10.1016/j.scitotenv.2010.04.017](#).
- Binkowski, Francis S., and Uma Shankar. 1995. "The Regional Particulate Matter Model: 1. Model description and preliminary results." *Journal of Geophysical Research* 100 (D12): 26191. doi:[10.1029/95jd02093](#).
- Biswas, K.F., Badar M. Ghauri, and Liaquat Husain. 2008. "Gaseous and aerosol pollutants during fog and clear episodes in South Asian urban atmosphere." *Atmospheric Environment* 42 (33): 7775–7785. doi:[10.1016/j.atmosenv.2008.04.056](#).
- Brook, Jeffrey R., Alan H. Wiebe, Sandra A. Woodhouse, Celine V. Audette, Tom F. Dann, Sandra Callaghan, Maria Piechowski, Ewa Dabek-Zlotorzynska, and Joseph F. Dlouhy. 1997. "Temporal and spatial relationships in fine particle strong acidity, sulphate, PM<sub>10</sub>, and PM<sub>2.5</sub> across multiple canadian locations." *Atmospheric Environment* 31 (24): 4223–4236. doi:[10.1016/s1352-2310\(97\)00248-3](#).
- Buijsman, Ed, Jan M.M. Aben, Bernard G. Van Elzakker, and Marcel G. Mennen. 1998. "An automatic atmospheric ammonia network in the Netherlands set-up and results." *Atmospheric Environment* 32 (3): 317–324. doi:[10.1016/s1352-2310\(97\)00233-1](#).
- Burkhardt, J., M.A. Sutton, C. Milford, R.L. Storeton-West, and D. Fowler. 1998. "Ammonia concentrations at a site in Southern Scotland from 2yr of continuous measurements." *Atmospheric Environment* 32 (3): 325–331. doi:[10.1016/s1352-2310\(97\)00198-2](#).
- Cadle, S.H., R.J. Countess, and N.A. Kelly. 1982. "Nitric acid and ammonia in urban and rural locations." *Atmospheric Environment (1967)* 16 (10): 2501–2506. doi:[10.1016/0004-6981\(82\)90141-x](#).
- Cao, Jun-Ji, Ting Zhang, Judith C. Chow, John G. Watson, Feng Wu, and Hua Li. 2009. "Characterization of Atmospheric Ammonia over Xi'an, China." *Aerosol and Air Quality Research* 9 (2): 277–289. doi:[10.4209/aaqr.2008.10.0043](#).
- Cape, J.N., Y.S. Tang, N. van Dijk, L. Love, M.A. Sutton, and S.C.F. Palmer. 2004. "Concentrations of ammonia and nitrogen dioxide at roadside verges, and their contribution to nitrogen deposition." *Environmental Pollution* 132 (3): 469–478. doi:[10.1016/j.envpol.2004.05.009](#).
- Carmichael, Gregory R., Martin Ferm, Narisara Thongboonchoo, Jung-Hun Woo, L.Y. Chan, Kentaro Murano, Pham Hung Viet, et al. 2003. "Measurements of sulfur dioxide, ozone and ammonia concentrations in Asia, Africa, and South America using passive samplers." *Atmospheric Environment* 37 (9-10): 1293–1308. doi:[10.1016/s1352-2310\(02\)01009-9](#).



- Chang, Yunhua, Zhong Zou, Congrui Deng, Kan Huang, Jeffrey L. Collett, Jing Lin, and Guoshun Zhuang. 2016. "The importance of vehicle emissions as a source of atmospheric ammonia in the megacity of Shanghai." *Atmospheric Chemistry and Physics* 16 (5): 3577–3594. doi:[10.5194/acp-16-3577-2016](https://doi.org/10.5194/acp-16-3577-2016).
- Clegg, Simon L., Peter Brimblecombe, and Anthony S. Wexler. 1998. "Thermodynamic Model of the System  $\text{H}^+ - \text{NH}_4^+ - \text{SO}_4^{2-} - \text{NO}_3^- - \text{H}_2\text{O}$  at Tropospheric Temperatures." *The Journal of Physical Chemistry A* 102 (12): 2137–2154. doi:[10.1021/jp973042r](https://doi.org/10.1021/jp973042r).
- Erisman, Jan-Willem, Aart W.M. Vermetten, Willem A.H. Asman, Anita Waijers-Ijpelaar, and Jacob Slanina. 1988. "Vertical distribution of gases and aerosols: The behaviour of ammonia and related components in the lower atmosphere." *Atmospheric Environment* (1967) 22 (6): 1153–1160. doi:[10.1016/0004-6981\(88\)90345-9](https://doi.org/10.1016/0004-6981(88)90345-9).
- Fountoukis, C., and A. Nenes. 2007. "ISORROPIA II: a computationally efficient thermodynamic equilibrium model for  $\text{K}^+ - \text{Ca}^{2+} - \text{Mg}^{2+} - \text{NH}_4^+ - \text{Na}^+ - \text{SO}_4^{2-} - \text{NO}_3^- - \text{Cl}^- - \text{H}_2\text{O}$  aerosols." *Atmospheric Chemistry and Physics* 7 (17): 4639–4659. doi:[10.5194/acp-7-4639-2007](https://doi.org/10.5194/acp-7-4639-2007).
- Fountoukis, C., A. Nenes, A. Sullivan, R. Weber, T. Van Reken, M. Fischer, E. Matías, M. Moya, D. Farmer, and R. C. Cohen. 2009. "Thermodynamic characterization of Mexico City aerosol during MILAGRO 2006." *Atmospheric Chemistry and Physics* 9 (6): 2141–2156. doi:[10.5194/acp-9-2141-2009](https://doi.org/10.5194/acp-9-2141-2009).
- Friese, Elmar, and Adolf Ebel. 2010. "Temperature Dependent Thermodynamic Model of the System  $\text{H}^+ - \text{NH}_4^+ - \text{Na}^+ - \text{SO}_4^{2-} - \text{NO}_3^- - \text{Cl}^- - \text{H}_2\text{O}$ ." *The Journal of Physical Chemistry A* 114 (43): 11595–11631. doi:[10.1021/jp101041j](https://doi.org/10.1021/jp101041j).
- Georgii, H. W., and G. Gravenhorst. 1977. "The ocean as source or sink of reactive trace-gases." *Pure and Applied Geophysics PAGEOPH* 115 (3): 503–511. doi:[10.1007/bf00876117](https://doi.org/10.1007/bf00876117).
- Georgii, H. W., and W. J. Müller. 1974. "On the distribution of ammonia in the middle and lower troposphere." *Tellus* 26 (1-2): 180–184. doi:[10.3402/tellusa.v26i1-2.9770](https://doi.org/10.3402/tellusa.v26i1-2.9770).
- Gibb, Stuart W., R. Fauzi C. Mantoura, and Peter S. Liss. 1999. "Ocean-atmosphere exchange and atmospheric speciation of ammonia and methylamines in the region of the NW Arabian Sea." *Global Biogeochemical Cycles* 13 (1): 161–178. doi:[10.1029/98gb00743](https://doi.org/10.1029/98gb00743).
- Gong, L., R. Lewicki, R. J. Griffin, J. H. Flynn, B. L. Lefer, and F. K. Tittel. 2011. "Atmospheric ammonia measurements in Houston, TX using an external-cavity quantum cascade laser-based sensor." *Atmospheric Chemistry and Physics* 11 (18): 9721–9733. doi:[10.5194/acp-11-9721-2011](https://doi.org/10.5194/acp-11-9721-2011).
- Gong, Longwen, Rafał Lewicki, Robert J. Griffin, Frank K. Tittel, Chantelle R. Lonsdale, Robin G. Stevens, Jeffrey R. Pierce, et al. 2013. "Role of atmospheric ammonia in particulate matter formation in Houston during summertime." *Atmospheric Environment* 77:893–900. doi:[10.1016/j.atmosenv.2013.04.079](https://doi.org/10.1016/j.atmosenv.2013.04.079).
- Harrison, Roy M., and A.G. Allen. 1990. "Measurements of atmospheric  $\text{HNO}_3$ ,  $\text{HCl}$  and associated species on a small network in eastern England." *Atmospheric Environment. Part A. General Topics* 24 (2): 369–376. doi:[10.1016/0960-1686\(90\)90116-5](https://doi.org/10.1016/0960-1686(90)90116-5).
- Hassan, Salwa K., Ahmed A. El-Abssawy, and Mamdouh I. Khoder. 2013. "Characteristics of gas-phase nitric acid and ammonium-nitrate-sulfate aerosol, and their gas-phase precursors in a suburban area in Cairo, Egypt." *Atmospheric Pollution Research* 4 (1): 117–129. doi:[10.5094/apr.2013.012](https://doi.org/10.5094/apr.2013.012).
- Heald, C. L., J. L. Collett Jr., T. Lee, K. B. Benedict, F. M. Schwandner, Y. Li, L. Clarisse, et al. 2012. "Atmospheric ammonia and particulate inorganic nitrogen over the United States." *Atmospheric Chemistry and Physics* 12 (21): 10295–10312. doi:[10.5194/acp-12-10295-2012](https://doi.org/10.5194/acp-12-10295-2012).
- Hoek, Gerard, Marcel G. Mennen, George A. Allen, Peter Hofschreuder, and Ton Van Der Meulen. 1996. "Concentrations of acidic air pollutants in The Netherlands." *Atmospheric Environment* 30 (18): 3141–3150. doi:[10.1016/1352-2310\(96\)00032-5](https://doi.org/10.1016/1352-2310(96)00032-5).
- Hoell, James M., Charles N. Harward, and Burnie S. Williams. 1980. "Remote infrared heterodyne radiometer measurements of atmospheric ammonia profiles." *Geophysical Research Letters* 7 (5): 313–316. doi:[10.1029/g1007i005p00313](https://doi.org/10.1029/g1007i005p00313).
- Hu, Min, Zhijun Wu, J. Slanina, Peng Lin, Shang Liu, and Limin Zeng. 2008. "Acidic gases, ammonia and water-soluble ions in  $\text{PM}_{2.5}$  at a coastal site in the Pearl River Delta, China." *Atmospheric Environment* 42 (25): 6310–6320. doi:[10.1016/j.atmosenv.2008.02.015](https://doi.org/10.1016/j.atmosenv.2008.02.015).
- Hu, Qingjing, Leiming Zhang, Greg J. Evans, and Xiaohong Yao. 2014. "Variability of atmospheric ammonia related to potential emission sources in downtown Toronto, Canada." *Atmospheric Environment* 99:365–373. doi:[10.1016/j.atmosenv.2014.10.006](https://doi.org/10.1016/j.atmosenv.2014.10.006).
- Ianniello, A., F. Spataro, G. Esposito, I. Allegrini, E. Rantica, M. P. Ancora, M. Hu, and T. Zhu. 2010. "Occurrence of gas phase ammonia in the area of Beijing (China)." *Atmospheric Chemistry and Physics* 10 (19): 9487–9503. doi:[10.5194/acp-10-9487-2010](https://doi.org/10.5194/acp-10-9487-2010).
- Jacobson, Mark Z. 1999. "Studying the effects of calcium and magnesium on size-distributed nitrate and ammonium with EQUISOLV II." *Atmospheric Environment* 33 (22): 3635–3649. doi:[10.1016/s1352-2310\(99\)00105-3](https://doi.org/10.1016/s1352-2310(99)00105-3).

- Jacobson, Mark Z., Azadeh Tabazadeh, and Richard P. Turco. 1996. "Simulating equilibrium within aerosols and nonequilibrium between gases and aerosols." *Journal of Geophysical Research: Atmospheres* 101 (D4): 9079–9091. doi:[10.1029/96jd00348](https://doi.org/10.1029/96jd00348).
- Johnson, Martin T., Peter S. Liss, Thomas G. Bell, Timothy J. Lesworth, Alex R. Baker, Andrew J. Hind, Timothy D. Jickells, Karabi F. Biswas, E. Malcolm S. Woodward, and Stuart W. Gibb. 2008. "Field observations of the ocean-atmosphere exchange of ammonia: Fundamental importance of temperature as revealed by a comparison of high and low latitudes." *Global Biogeochemical Cycles* 22 (1): n/a–n/a. doi:[10.1029/2007gb003039](https://doi.org/10.1029/2007gb003039).
- Kim, Jae-Seok, Anna Liza Bais, Sun-hee Kang, Jaehoon Lee, and Kihong Park. 2012. "A semi-continuous measurement of gaseous ammonia and particulate ammonium concentrations in PM<sub>2.5</sub> in the ambient atmosphere." *Journal of Atmospheric Chemistry* 68 (3): 251–263. doi:[10.1007/s10874-012-9220-y](https://doi.org/10.1007/s10874-012-9220-y).
- Kim, Yong Pyo, and John H. Seinfeld. 1995. "Atmospheric Gas–Aerosol Equilibrium: III. Thermodynamics of Crustal Elements Ca<sup>2+</sup>, K<sup>+</sup>, and Mg<sup>2+</sup>." *Aerosol Science and Technology* 22 (1): 93–110. doi:[10.1080/02786829408959730](https://doi.org/10.1080/02786829408959730).
- Kim, Yong Pyo, John H Seinfeld, and Pradeep Saxena. 1993. "Atmospheric gas-aerosol equilibrium I. Thermodynamic model." *Aerosol Science and Technology* 19 (2): 157–181. doi:[10.1080/02786829308959628](https://doi.org/10.1080/02786829308959628).
- Langridge, Justin M., Daniel Lack, Charles A. Brock, Roya Bahreini, Ann M. Middlebrook, J. Andrew Neuman, John B. Nowak, et al. 2012. "Evolution of aerosol properties impacting visibility and direct climate forcing in an ammonia-rich urban environment." *Journal of Geophysical Research: Atmospheres* 117 (D21): D00V11. doi:[10.1029/2011jd017116](https://doi.org/10.1029/2011jd017116).
- LeBel, Peter J., James M. Hoell, Joel S. Levine, and Stephanie A. Vay. 1985. "Aircraft measurements of ammonia and nitric acid in the lower troposphere." *Geophysical Research Letters* 12 (6): 401–404. doi:[10.1029/gl012i006p00401](https://doi.org/10.1029/gl012i006p00401).
- Lee, Hak Sung, Choong-Min Kang, Byung-Wook Kang, and Hui-Kang Kim. 1999. "Seasonal variations of acidic air pollutants in Seoul, South Korea." *Atmospheric Environment* 33 (19): 3143–3152. doi:[10.1016/s1352-2310\(98\)00382-3](https://doi.org/10.1016/s1352-2310(98)00382-3).
- Lee, Hak Sung, Richard A. Wadden, and Peter A. Scheff. 1993. "Measurement and evaluation of acid air pollutants in Chicago using an annular denuder system." *Atmospheric Environment. Part A. General Topics* 27 (4): 543–553. doi:[10.1016/0960-1686\(93\)90211-g](https://doi.org/10.1016/0960-1686(93)90211-g).
- Leen, J. Brian, Xiao-Ying Yu, Manish Gupta, Douglas S. Baer, John M. Hubbe, Celine D. Kluzek, Jason M. Tomlinson, and Mike R. Hubbell. 2013. "Fast In Situ Airborne Measurement of Ammonia Using a Mid-Infrared Off-Axis ICOS Spectrometer." *Environmental Science & Technology*: 130823150605002. doi:[10.1021/es401134u](https://doi.org/10.1021/es401134u).
- Li, Yi, Florian M. Schwandner, H. James Sewell, Angela Zivkovich, Mark Tigges, Suresh Raja, Stephen Holcomb, et al. 2014. "Observations of ammonia, nitric acid, and fine particles in a rural gas production region." *Atmospheric Environment* 83:80–89. doi:[10.1016/j.atmosenv.2013.10.007](https://doi.org/10.1016/j.atmosenv.2013.10.007).
- Li, Yi, Tammy M. Thompson, Martin Van Damme, Xi Chen, Katherine B. Benedict, Yixing Shao, Derek Day, et al. 2017. "Temporal and spatial variability of ammonia in urban and agricultural regions of northern Colorado, United States." *Atmospheric Chemistry and Physics* 17 (10): 6197–6213. doi:[10.5194/acp-17-6197-2017](https://doi.org/10.5194/acp-17-6197-2017).
- Lin, Y, M Cheng, W Ting, and C Yeh. 2006. "Characteristics of gaseous HNO<sub>2</sub>, HNO<sub>3</sub>, NH<sub>3</sub> and particulate ammonium nitrate in an urban city of Central Taiwan." *Atmospheric Environment* 40 (25): 4725–4733. doi:[10.1016/j.atmosenv.2006.04.037](https://doi.org/10.1016/j.atmosenv.2006.04.037).
- Makkonen, U., A. Virkkula, J. Mäntykenttä, H. Hakola, P. Keronen, V. Vakkari, and P. P. Aalto. 2012. "Semi-continuous gas and inorganic aerosol measurements at a Finnish urban site: comparisons with filters, nitrogen in aerosol and gas phases, and aerosol acidity." *Atmospheric Chemistry and Physics* 12 (12): 5617–5631. doi:[10.5194/acp-12-5617-2012](https://doi.org/10.5194/acp-12-5617-2012).
- Matsumoto, Mitsuhiro, and Toshiichi Okita. 1998. "Long term measurements of atmospheric gaseous and aerosol species using an annular denuder system in Nara, Japan." *Atmospheric Environment* 32 (8): 1419–1425. doi:[10.1016/s1352-2310\(97\)00270-7](https://doi.org/10.1016/s1352-2310(97)00270-7).
- McCulloch, Ronald B., G. Stephen Few, George C. Murray, and Viney P. Aneja. 1998. "Analysis of ammonia, ammonium aerosols and acid gases in the atmosphere at a commercial hog farm in eastern North Carolina, USA." *Environmental Pollution* 102 (1): 263–268. doi:[10.1016/s0269-7491\(98\)80042-0](https://doi.org/10.1016/s0269-7491(98)80042-0).
- McCurdy, Thomas, Michael P. Zelenka, Philip M. Lawrence, Robert M. Houston, and Robert Burton. 1999. "Acid aerosols in the Pittsburgh Metropolitan area." *Atmospheric Environment* 33 (30): 5133–5145. doi:[10.1016/s1352-2310\(99\)00119-3](https://doi.org/10.1016/s1352-2310(99)00119-3).
- Meng, Z. Y., W. L. Lin, X. M. Jiang, P. Yan, Y. Wang, Y. M. Zhang, X. F. Jia, and X. L. Yu. 2011. "Characteristics of atmospheric ammonia over Beijing, China." *Atmospheric Chemistry and Physics* 11 (12): 6139–6151. doi:[10.5194/acp-11-6139-2011](https://doi.org/10.5194/acp-11-6139-2011).
- Meng, Zhao-Yang, Xiao-Bin Xu, Tao Wang, Xing-Ying Zhang, Xiao-Lan Yu, Shu-Feng Wang, Wei-Li Lin, Yi-Zhen Chen, Yi-An Jiang, and Xing-Qin An. 2010. "Ambient sulfur dioxide, nitrogen dioxide, and ammonia at ten background and rural sites in China during 2007–2008." *Atmospheric Environment* 44 (21–22): 2625–2631. doi:[10.1016/j.atmosenv.2010.04.008](https://doi.org/10.1016/j.atmosenv.2010.04.008).

- Meng, Zhaoyang. 2014. "Seasonal Variation of Ammonia and Ammonium Aerosol at a Background Station in the Yangtze River Delta Region, China." *Aerosol and Air Quality Research*. doi:[10.4209/aaqr.2013.02.0046](https://doi.org/10.4209/aaqr.2013.02.0046).
- Meng, Zhaoyang, Xiaobin Xu, Weili Lin, Yulin Xie, Bo Song, Shihui Jia, Rui Zhang, et al. 2017. "Role of ambient ammonia in particulate ammonium formation at a rural site in the North China Plain." *Atmospheric Chemistry and Physics Discussions*: 1–30. doi:[10.5194/acp-2017-174](https://doi.org/10.5194/acp-2017-174).
- Meng, Zhaoyue, John H. Seinfeld, Pradeep Saxena, and Yong Pyo Kim. 1995. "Atmospheric Gas-Aerosol Equilibrium: IV. Thermodynamics of Carbonates." *Aerosol Science and Technology* 23 (2): 131–154. doi:[10.1080/02786829508965300](https://doi.org/10.1080/02786829508965300).
- Müller, M., T. Mikoviny, S. Feil, S. Haidacher, G. Hanel, E. Hartungen, A. Jordan, et al. 2014. "A compact PTR-ToF-MS instrument for airborne measurements of volatile organic compounds at high spatiotemporal resolution." *Atmospheric Measurement Techniques* 7 (11): 3763–3772. doi:[10.5194/amt-7-3763-2014](https://doi.org/10.5194/amt-7-3763-2014).
- Nair, Arshad Arjunan, Fangqun Yu, and Gan Luo. 2019. "Spatioseasonal Variations of Atmospheric Ammonia Concentrations Over the United States: Comprehensive Model-Observation Comparison." *Journal of Geophysical Research: Atmospheres* 124 (12): 6571–6582. doi:[10.1029/2018JD030057](https://doi.org/10.1029/2018JD030057).
- Nenes, Athanasios, Spyros N Pandis, and Christodoulos Pilinis. 1998. "ISORROPIA: A new thermodynamic equilibrium model for multiphase multicomponent inorganic aerosols." *Aquatic geochemistry* 4 (1): 123–152. doi:[10.1023/A:1009604003981](https://doi.org/10.1023/A:1009604003981).
- Nowak, J. B., J. A. Neuman, R. Bahreini, C. A. Brock, A. M. Middlebrook, A. G. Wollny, J. S. Holloway, J. Peischl, T. B. Ryerson, and F. C. Fehsenfeld. 2010. "Airborne observations of ammonia and ammonium nitrate formation over Houston, Texas." *Journal of Geophysical Research* 115 (D22). doi:[10.1029/2010jd014195](https://doi.org/10.1029/2010jd014195).
- Nowak, J. B., J. A. Neuman, R. Bahreini, A. M. Middlebrook, J. S. Holloway, S. A. McKeen, D. D. Parrish, T. B. Ryerson, and M. Trainer. 2012. "Ammonia sources in the California South Coast Air Basin and their impact on ammonium nitrate formation." *Geophysical Research Letters* 39 (7): n/a–n/a. doi:[10.1029/2012gl051197](https://doi.org/10.1029/2012gl051197).
- Nowak, J. B., J. A. Neuman, K. Kozai, L. G. Huey, D. J. Tanner, J. S. Holloway, T. B. Ryerson, G. J. Frost, S. A. McKeen, and F. C. Fehsenfeld. 2007. "A chemical ionization mass spectrometry technique for airborne measurements of ammonia." *Journal of Geophysical Research: Atmospheres* 112 (D10). doi:[10.1029/2006jd007589](https://doi.org/10.1029/2006jd007589).
- Ottley, C.J., and Roy M. Harrison. 1992. "The spatial distribution and particle size of some inorganic nitrogen, sulphur and chlorine species over the North Sea." *Atmospheric Environment. Part A. General Topics* 26 (9): 1689–1699. doi:[10.1016/0960-1686\(92\)90067-u](https://doi.org/10.1016/0960-1686(92)90067-u).
- Pandolfi, M., F. Amato, C. Reche, A. Alastuey, R. P. Otjes, M. J. Blom, and X. Querol. 2012. "Summer ammonia measurements in a densely populated Mediterranean city." *Atmospheric Chemistry and Physics* 12 (16): 7557–7575. doi:[10.5194/acp-12-7557-2012](https://doi.org/10.5194/acp-12-7557-2012).
- Parmar, R.S, G.S Satsangi, A Lakhani, S.S Srivastava, and S Prakash. 2001. "Simultaneous measurements of ammonia and nitric acid in ambient air at Agra (27°10'N and 78°05'E) (India)." *Atmospheric Environment* 35 (34): 5979–5988. doi:[10.1016/s1352-2310\(00\)00394-0](https://doi.org/10.1016/s1352-2310(00)00394-0).
- Perrino, C, M Catrambone, A Di Menno Di Bucchianico, and I Allegrini. 2002. "Gaseous ammonia in the urban area of Rome, Italy and its relationship with traffic emissions." *Atmospheric Environment* 36 (34): 5385–5394. doi:[10.1016/s1352-2310\(02\)00469-7](https://doi.org/10.1016/s1352-2310(02)00469-7).
- Pilinis, Christodoulos, and John H. Seinfeld. 1987. "Continued development of a general equilibrium model for inorganic multicomponent atmospheric aerosols." *Atmospheric Environment (1967)* 21 (11): 2453–2466. doi:[10.1016/0004-6981\(87\)90380-5](https://doi.org/10.1016/0004-6981(87)90380-5).
- Pio, C.A., I.M. Santos, T.D. Anacleto, T.V. Nunes, and R.M. Leal. 1991. "Particulate and gaseous air pollutant levels at the portuguese West Coast." *Atmospheric Environment. Part A. General Topics* 25 (3-4): 669–680. doi:[10.1016/0960-1686\(91\)90065-f](https://doi.org/10.1016/0960-1686(91)90065-f).
- Pryor, S.C., R.J. Barthelmie, L.L. Sørensen, and B. Jensen. 2001. "Ammonia concentrations and fluxes over a forest in the midwestern USA." *Atmospheric Environment* 35 (32): 5645–5656. doi:[10.1016/s1352-2310\(01\)00259-x](https://doi.org/10.1016/s1352-2310(01)00259-x).
- Quinn, Patricia K., Timothy S. Bates, James E. Johnson, David S. Covert, and Robert J. Charlson. 1990. "Interactions between the sulfur and reduced nitrogen cycles over the central Pacific Ocean." *Journal of Geophysical Research* 95 (D10): 16405. doi:[10.1029/jd095id10p16405](https://doi.org/10.1029/jd095id10p16405).
- Reche, Cristina, Mar Viana, Marco Pandolfi, Andrés Alastuey, Teresa Moreno, Fulvio Amato, Anna Ripoll, and Xavier Querol. 2012. "Urban NH<sub>3</sub> levels and sources in a Mediterranean environment." *Atmospheric Environment* 57:153–164. doi:[10.1016/j.atmosenv.2012.04.021](https://doi.org/10.1016/j.atmosenv.2012.04.021).
- Robarge, Wayne P., John T. Walker, Ronald B. McCulloch, and George Murray. 2002. "Atmospheric concentrations of ammonia and ammonium at an agricultural site in the southeast United States." *Atmospheric Environment* 36 (10): 1661–1674. doi:[10.1016/s1352-2310\(02\)00171-1](https://doi.org/10.1016/s1352-2310(02)00171-1).
- Saxena, Pradeep, A. Belle Hudischewskyj, Christian Seigneur, and John H. Seinfeld. 1986. "A comparative study of equilibrium approaches to the chemical characterization of secondary aerosols." *Atmospheric Environment (1967)* 20 (7): 1471–1483. doi:[10.1016/0004-6981\(86\)90019-3](https://doi.org/10.1016/0004-6981(86)90019-3).

- Schaap, M., R. P. Otjes, and E. P. Weijers. 2011. "Illustrating the benefit of using hourly monitoring data on secondary inorganic aerosol and its precursors for model evaluation." *Atmospheric Chemistry and Physics* 11 (21): 11041–11053. doi:10.5194/acp-11-11041-2011.
- Schiferl, Luke D., Colette L. Heald, John B. Nowak, John S. Holloway, J. Andrew Neuman, Roya Bahreini, Ilana B. Pollack, Thomas B. Ryerson, Christine Wiedinmyer, and Jennifer G. Murphy. 2014. "An investigation of ammonia and inorganic particulate matter in California during the CalNex campaign." *Journal of Geophysical Research: Atmospheres* 119 (4): 1883–1902. doi:10.1002/2013jd020765.
- Sharma, S. K., T. K. Mandal, Rohtash, Manish Kumar, N. C. Gupta, H. Pathak, R. C. Harit, and Mohit Saxena. 2014. "Measurement of Ambient Ammonia over the National Capital Region of Delhi, India." *MAPAN* 29 (3): 165–173. doi:10.1007/s12647-014-0098-9.
- Shen, Jianlin, Xuejun Liu, Ying Zhang, Andreas Fangmeier, Keith Goulding, and Fusuo Zhang. 2011. "Atmospheric ammonia and particulate ammonium from agricultural sources in the North China Plain." *Atmospheric Environment* 45 (28): 5033–5041. doi:10.1016/j.atmosenv.2011.02.031.
- Shephard, M. W., C. A. McLinden, K. E. Cady-Pereira, M. Luo, S. G. Moussa, A. Leithhead, J. Liggio, et al. 2015. "Tropospheric Emission Spectrometer (TES) satellite observations of ammonia, methanol, formic acid, and carbon monoxide over the Canadian oil sands: validation and model evaluation." *Atmospheric Measurement Techniques* 8 (12): 5189–5211. doi:10.5194/amt-8-5189-2015.
- Sudheer, A.K., and R. Rengarajan. 2015. "Time-resolved inorganic chemical composition of fine aerosol and associated precursor gases over an urban environment in western India: Gas-aerosol equilibrium characteristics." *Atmospheric Environment* 109:217–227. doi:10.1016/j.atmosenv.2015.03.028.
- Suh, Helen H., George A. Allen, Petros Koutrakis, and Robert M. Burton. 1995. "Spatial Variation in Acidic Sulfate and Ammonia Concentrations within Metropolitan Philadelphia." *Journal of the Air & Waste Management Association* 45 (6): 442–452. doi:10.1080/10473289.1995.10467374.
- Sun, Kang, Karen Cady-Pereira, David J. Miller, Lei Tao, Mark A. Zondlo, John B. Nowak, J. A. Neuman, et al. 2015. "Validation of TES ammonia observations at the single pixel scale in the San Joaquin Valley during DISCOVER-AQ." *Journal of Geophysical Research: Atmospheres* 120 (10): 5140–5154. doi:10.1002/2014jd022846.
- Tang, Yuk S., Christine F. Braban, Ulrike Dragosits, Anthony J. Dore, Ivan Simmons, Netty van Dijk, Janet Poskitt, et al. 2018. "Drivers for spatial, temporal and long-term trends in atmospheric ammonia and ammonium in the UK." *Atmospheric Chemistry and Physics* 18 (2): 705–733. doi:10.5194/acp-18-705-2018.
- Teng, Xiaolin, Qingjing Hu, Leiming Zhang, Jiajia Qi, Jinhui Shi, Huan Xie, Huiwang Gao, and Xiaohong Yao. 2017. "Identification of Major Sources of Atmospheric NH<sub>3</sub> in an Urban Environment in Northern China During Wintertime." *Environmental Science & Technology* 51 (12): 6839–6848. doi:10.1021/acs.est.7b00328.
- Topping, D. O., G. B. McFiggans, and H. Coe. 2005. "A curved multi-component aerosol hygroscopicity model framework: Part 1 – Inorganic compounds." *Atmospheric Chemistry and Physics* 5 (5): 1205–1222. doi:10.5194/acp-5-1205-2005.
- Vogt, E., A. Held, and O. Klemm. 2005. "Sources and concentrations of gaseous and particulate reduced nitrogen in the city of Münster (Germany)." *Atmospheric Environment* 39 (38): 7393–7402. doi:10.1016/j.atmosenv.2005.09.012.
- Walker, J.T., Dave R Whitall, Wayne Robarge, and Hans W. Paerl. 2004. "Ambient ammonia and ammonium aerosol across a region of variable ammonia emission density." *Atmospheric Environment* 38 (9): 1235–1246. doi:10.1016/j.atmosenv.2003.11.027.
- Wang, Shanshan, Jialiang Nan, Chanzhen Shi, Qingyan Fu, Song Gao, Dongfang Wang, Huxiong Cui, Alfonso Saiz-Lopez, and Bin Zhou. 2015. "Atmospheric ammonia and its impacts on regional air quality over the megacity of Shanghai, China." *Scientific Reports* 5 (1). doi:10.1038/srep15842.
- Wentworth, Gregory R., Jennifer G. Murphy, Betty Croft, Randall V. Martin, Jeffrey R. Pierce, Jean-Sébastien Côté, Isabelle Courchesne, et al. 2016. "Ammonia in the summertime Arctic marine boundary layer: sources, sinks, and implications." *Atmospheric Chemistry and Physics* 16 (4): 1937–1953. doi:10.5194/acp-16-1937-2016.
- Wexler, Anthony S., and John H. Seinfeld. 1991. "Second-generation inorganic aerosol model." *Atmospheric Environment. Part A. General Topics* 25 (12): 2731–2748. doi:10.1016/0960-1686(91)90203-j.
- Wilson, Sacoby M., and Marc L. Serre. 2007. "Use of passive samplers to measure atmospheric ammonia levels in a high-density industrial hog farm area of eastern North Carolina." *Atmospheric Environment* 41 (28): 6074–6086. doi:10.1016/j.atmosenv.2007.03.004.
- Wu, Zhijun, Min Hu, Kesheng Shao, and Jacob Slanina. 2009. "Acidic gases, NH<sub>3</sub> and secondary inorganic ions in PM<sub>10</sub> during summertime in Beijing, China and their relation to air mass history." *Chemosphere* 76 (8): 1028–1035. doi:10.1016/j.chemosphere.2009.04.066.
- Yamamoto, Noriko, Hideaki Nishiura, Takahisa Honjo, Yoshiki Ishikawa, and Koji Suzuki. 1995. "A long-term study of atmospheric ammonia and particulate ammonium concentrations in Yokohama, Japan." *Atmospheric Environment* 29 (1): 97–103. doi:10.1016/1352-2310(94)00226-b.



- Yao, X. H., and L. Zhang. 2013. "Analysis of passive-sampler monitored atmospheric ammonia at 74 sites across southern Ontario, Canada." *Biogeosciences* 10 (12): 7913–7925. doi:[10.5194/bg-10-7913-2013](https://doi.org/10.5194/bg-10-7913-2013).
- Yao, Xiaohong, Arthur P.S. Lau, Ming Fang, Chak K. Chan, and Min Hu. 2003. "Size distributions and formation of ionic species in atmospheric particulate pollutants in Beijing, China: 1—inorganic ions." *Atmospheric Environment* 37 (21): 2991–3000. doi:[10.1016/s1352-2310\(03\)00255-3](https://doi.org/10.1016/s1352-2310(03)00255-3).
- Yao, Xiaohong, Tsz Yan Ling, Ming Fang, and Chak K. Chan. 2006. "Comparison of thermodynamic predictions for in situ pH in PM<sub>2.5</sub>." *Atmospheric Environment* 40 (16): 2835–2844. doi:[10.1016/j.atmosenv.2006.01.006](https://doi.org/10.1016/j.atmosenv.2006.01.006).
- Yao, Xiaohong, and Leiming Zhang. 2016. "Trends in atmospheric ammonia at urban, rural, and remote sites across North America." *Atmospheric Chemistry and Physics* 16 (17): 11465–11475. doi:[10.5194/acp-16-11465-2016](https://doi.org/10.5194/acp-16-11465-2016).
- Yokelson, R. J., J. G. Goode, D. E. Ward, R. A. Susott, R. E. Babbitt, D. D. Wade, I. Bertschi, D. W. T. Griffith, and W. M. Hao. 1999. "Emissions of formaldehyde, acetic acid, methanol, and other trace gases from biomass fires in North Carolina measured by airborne Fourier transform infrared spectroscopy." *Journal of Geophysical Research: Atmospheres* 104 (D23): 30109–30125. doi:[10.1029/1999jd900817](https://doi.org/10.1029/1999jd900817).
- Zanten, M.C. van, R.J. Wichink Kruit, R. Hoogerbrugge, E. Van der Swaluw, and W.A.J. van Pul. 2017. "Trends in ammonia measurements in the Netherlands over the period 1993–2014." *Atmospheric Environment* 148:352–360. doi:[10.1016/j.atmosenv.2016.11.007](https://doi.org/10.1016/j.atmosenv.2016.11.007).
- Zaveri, Rahul A., Richard C. Easter, and Leonard K. Peters. 2005. "A computationally efficient Multicomponent Equilibrium Solver for Aerosols (MESA)." *Journal of Geophysical Research* 110 (D24). doi:[10.1029/2004jd005618](https://doi.org/10.1029/2004jd005618).
- Zbieranowski, Antoni L., and Julian Aherne. 2012. "Spatial and temporal concentration of ambient atmospheric ammonia in southern Ontario, Canada." *Atmospheric Environment* 62:441–450. doi:[10.1016/j.atmosenv.2012.08.041](https://doi.org/10.1016/j.atmosenv.2012.08.041).
- Ziereis, H., and F. Arnold. 1986. "Gaseous ammonia and ammonium ions in the free troposphere." *Nature* 321 (6069): 503–505. doi:[10.1038/321503a0](https://doi.org/10.1038/321503a0).
